# Supplementary material for: Copy number variation genotyping using family information
Source: PubMed Central journal article supplement (PMC3668900; doi:10.1186/1471-2105-14-157), 2013-05-09
Supplement: 1471-2105-14-157-S1.pdf [file 1471-2105-14-157-S1.pdf]

|    |    | F0                | F1                 | F2                                                           | F3                                                        | F4          |
|----|----|-------------------|--------------------|--------------------------------------------------------------|-----------------------------------------------------------|-------------|
| M0 | O0 | 1-e               |                    |                                                              |                                                           |             |
|    | O1 | 0.25e             |                    |                                                              |                                                           |             |
|    | O2 | 0.25e             |                    |                                                              |                                                           |             |
|    | O3 | 0.25e             |                    |                                                              |                                                           |             |
|    | O4 | 0.25e             |                    |                                                              |                                                           |             |
| M1 | O0 | 0.5(1-e)          | 0.25(1-e)          |                                                              |                                                           |             |
|    | O1 | 0.5(1-e)          | 0.5(1-e)           |                                                              |                                                           |             |
|    | O2 | 0.333e            | 0.25(1-e)          |                                                              |                                                           |             |
|    | O3 | 0.333e            | 0.5e               |                                                              |                                                           |             |
|    | O4 | 0.333e            | 0.5e               |                                                              |                                                           |             |
| M2 | O0 | 0.5a(1-e)+0.25e   | 0.25a(1-e)+0.3333e | 0.25a <sup>2</sup> (1-e)+0.25e                               |                                                           |             |
|    | O1 | (1-a)(1-e)        | (0.5-0.25a)(1-e)   | a(1-a)(1-e)+0.25e                                            |                                                           |             |
|    | O2 | 0.5a(1-e)+0.25e   | (0.5-0.25a)(1-e)   | [(1-a) <sup>2</sup> +0.5a <sup>2</sup> ](1-e)                |                                                           |             |
|    | O3 | 0.25e             | 0.25a(1-e)+0.3333e | a(1-a)(1-e)+0.25e                                            |                                                           |             |
|    | O4 | 0.25e             | 0.3333e            | 0.25a <sup>2</sup> (1-e)+0.25e                               |                                                           |             |
| M3 | O0 | 0.5a(1-e)+0.3333e | 0.25a(1-e)+0.5e    | 0.25a <sup>2</sup> (1-e)+0.3333e                             | 0.25a <sup>2</sup> (1-e)+0.5e                             |             |
|    | O1 | 0.5(1-a)(1-e)     | 0.25(1-e)          | 0.75a(1-a)(1-e)+0.3333e                                      | 0.5a(1-a)(1-e)+0.5e                                       |             |
|    | O2 | 0.5(1-a)(1-e)     | 0.5(1-a)(1-e)      | (0.5(1-a) <sup>2</sup> +0.25a(1-a)+0.25a <sup>2</sup> )(1-e) | (0.5a(1-a)+0.25(1-a) <sup>2</sup> )(1-e)                  |             |
|    | O3 | 0.5a(1-e)+0.3333e | 0.25(1-e)          | (0.5(1-a) <sup>2</sup> +0.25a(1-a)+0.25a <sup>2</sup> )(1-e) | (0.5(1-a) <sup>2</sup> +0.5a <sup>2</sup> )(1-e)          |             |
|    | O4 | 0.3333e           | 0.25a(1-e)+0.5e    | (0.75a(1-a)+0.25a <sup>2</sup> )(1-e)+0.3333e                | (0.25(1-a) <sup>2</sup> +a(1-a)+0.25a <sup>2</sup> )(1-e) |             |
| M4 | O0 | 0.5e              | e                  | 0.5e                                                         | 0.5e                                                      | 0.5e        |
|    | O1 | 0.25(1-e)         | 0.125(1-e)         | 0.125a(1-e)+0.5e                                             | 0.125a(1-e)+0.5e                                          | 0.5e        |
|    | O2 | 0.5(1-e)          | 0.375(1-e)         | 0.25(1-e)                                                    | 0.125(1+a)(1-e)                                           | 0.0625(1-e) |
|    | O3 | 0.25(1-e)         | 0.375(1-e)         | (0.5-0.25a)(1-e)                                             | 0.125(3-2a)(1-e)                                          | 0.25(1-e)   |
|    | O4 | 0.5e              | 0.125(1-e)         | (0.25+0.125a)(1-e)                                           | 0.5(1-e)                                                  | 0.6875(1-e) |

The Conditional probability of total copy number of an offspring(O) given the copy number of mother(M) and father(F). The parameter **e** denotes the probability of de novo events and **a** denotes the probability of the rare chromosome-specific copy number configuration.
